# Supplementary material for: Knockout of an outer membrane protein operon of Anaplasma marginale by transposon mutagenesis
Source: Springer Nature journal article supplement (doi:10.1186/1471-2164-15-278), 2014-01-01
Supplement: 12864_2013_5994_MOESM1_ESM.pdf [file 12864_2013_5994_MOESM1_ESM.pdf]

**Figure 1. Specificity of primers and probes in RT-qPCR reactions.**

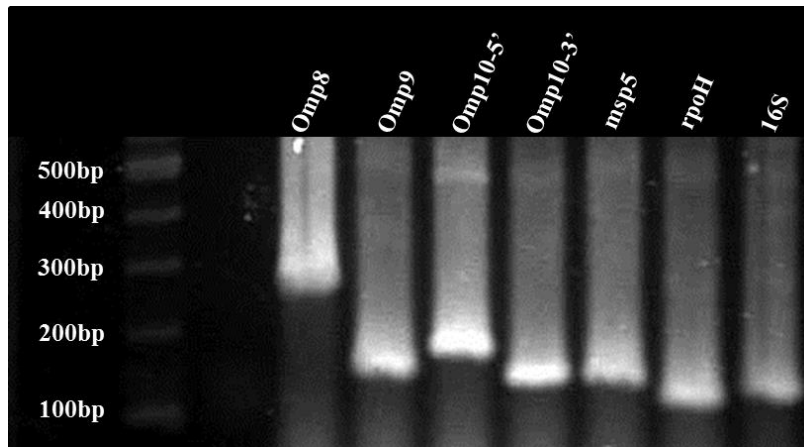

To evaluate the target specificity of primers and probes 5 $\mu$ l of qPCR product from each target was analyzed in a 2% Seakem LE (Lonza) agarose gel stained with SYBR gold nucleic acid gel stain (Life-Technologies), (*omp8*, 259bp), (*omp9*, 145bp), (*omp10-5'* end, 170bp), (*omp10-3'* end, 140bp), (*msp5*, 139bp), (*rpoH*, 116bp) and (*16S*, 131bp).

**Table 1. PCR conditions for the amplification of transcripts from *omp7* through *AM1225* intergenic regions.**

|           | <b>Step</b>  | <b>Temperature</b> | <b>Time</b> |
|-----------|--------------|--------------------|-------------|
| 35 cycles | Denaturation | 94°C               | 2 minutes   |
|           | Denaturation | 94°C               | 10 seconds  |
|           | Annealing    | 65°C               | 30 seconds  |
|           | Extension    | 68°C               | 15 seconds  |
|           | Extension    | 68°C               | 5 minutes   |

PCR reactions were performed in Bio-Rad PTC-200 thermocycler. Each reaction contained 200ng of cDNA combined with 200µM dNTP's, 0.3µM of forward and reverse primers and 1.25 units of primeSTAR GXL DNA polymerase (Takara). PCR products were electrophoretically separated using a 1 and 2% Seakem LE (Lonza) Agarose gel, and stained with SYBR gold nucleic acid gel stain (Life technologies) for UV visualization.

**Table 2. PCR conditions for the amplification of transcripts from *omp6* through *omp10* from cDNA obtained from ISE6 cells infected with *A. marginale* wild-type and *omp10::himar1* mutant organisms.**

|           | <b>Step</b>  | <b>Temperature</b> | <b>Time</b> |
|-----------|--------------|--------------------|-------------|
|           | Denaturation | 94°C               | 2 minutes   |
| 35 cycles | Denaturation | 94°C               | 10 seconds  |
|           | Annealing    | *60°C/**65°C       | 58 seconds  |
|           | Extension    | 68°C               | 2 minutes   |
|           | Extension    | 68°C               | 10 minutes  |

PCR reactions were performed in Bio-Rad PTC-200 thermocycler.

\*Annealing temperatures used for the amplification of *omp6*, *omp7*, *omp8* and 16S ribosomal subunit.

\*\*Annealing temperature used for the amplification of *omp9* and *omp10*.

Each reaction contained 200ng of cDNA combined with 200µM dNTP's, 0.3µM of forward and reverse primers and 1.25 units of primeSTAR GXL DNA polymerase (Takara). PCR products were electrophoretically separated using a 1 and 2% Seakem LE (Lonza) Agarose gel, and stained with SYBR gold nucleic acid gel stain (Life technologies) for UV visualization.

**Table 3. qPCR reactions and amplification conditions.**

|             | <b>Step</b>         | <b>Temperature</b> | <b>Time</b> |
|-------------|---------------------|--------------------|-------------|
| 40 cycles { | Denaturation        | 95°C               | 15 minutes  |
|             | Denaturation        | 94°C               | 15 seconds  |
|             | Annealing/Extension | 60°C               | 1 minute    |
|             | Data collection     |                    |             |

Each reaction had a net volume of 25µl containing 5µl of cDNA, 1X Quantitect Probe PCR master mix (QIAGEN), 0.4µM of forward and reverse primers, and 0.2µM of probe.

**Table 4. qPCR amplification efficiencies.**

| <b>*GOI</b>         | <b>qPCR efficiency <math>E=(5^{-1/\text{slope}})-1</math></b> |
|---------------------|---------------------------------------------------------------|
| <i>omp8</i>         | 0.98                                                          |
| <i>omp9</i>         | 0.96                                                          |
| <i>omp10-5' end</i> | 0.93                                                          |
| <i>omp10-3' end</i> | 0.97                                                          |
| <i>msp5</i>         | 0.95                                                          |
| <i>rpoH</i>         | 0.90                                                          |
| <i>16S</i>          | 0.90                                                          |

Primer-probe reaction efficiencies were determined for each primer-probe set targeting *omp8*, *omp9*, *omp10-3' end*, *omp10-5' end*, *msp5*, *rpoH*, and *16S* rRNA by performing triplicate reactions of a ten log range of 5-fold serial dilutions of cDNA for the purpose of generating standard curves from which reaction efficiencies could be calculated [1, 2].

\*GOI, gene of interest.

**Table 5. Relative amplification efficiencies.**

| <b>Reference genes</b> | <b>Relative efficiencies slopes</b> |
|------------------------|-------------------------------------|
| <i>msp5</i>            | <i>omp8</i> 0 .0327                 |
|                        | <i>omp9</i> 0 .0182                 |
|                        | <i>omp10-5' end</i> 0 .0267         |
|                        | <i>omp10-3' end</i> 0 .0826         |
| <i>rpoH</i>            | <i>omp8</i> 0 .0273                 |
|                        | <i>omp9</i> 0 .0127                 |
|                        | <i>omp10-5' end</i> 0 .0676         |
|                        | <i>omp10-3' end</i> 0 .1211         |
| <i>16S</i>             | <i>omp8</i> 0 .0226                 |
|                        | <i>omp9</i> 0 .0848                 |
|                        | <i>omp10-5' end</i> 0 .0061         |
|                        | <i>omp10-3' end</i> 0 .0223         |

Relative amplification efficiencies of the target genes (*omp8*, *9*, *10-5' end* and *10-3' end*) versus reference genes (*msp5*, *rpoH*, and *16S*) were calculated by performing standard curves for each amplicon in the same manner and conditions to those used to determine the amplification efficiencies. The Ct values generated were used to calculate a  $\Delta$ Ct value (Ct target gene-Ct reference gene) for each sample which corrected for any template loading discrepancy between reactions. Plots of  $\Delta$ Ct values versus the log of cDNA input were used to determine the slope of standard curves [1, 2].

## REFERENCES.

1. Bustin SA, Benes V, Garson JA, Hellemans J, Huggett J, Kubista M, Mueller R, Nolan T, Pfaffl MW, Shipley GL *et al*: **The MIQE guidelines: minimum information for publication of quantitative real-time PCR experiments.** *Clin Chemy* 2009, **55**: 611-622.
2. Tuzmen S, Kiefer J, Mousses S: **Validation of short interfering RNA knockdowns by quantitative real-time PCR.** *Methods Mol Biol* 2007, **353**:177-203.
