# Supplementary material for: Knockout of an outer membrane protein operon of Anaplasma marginale by transposon mutagenesis
Source: Springer Nature journal article supplement (doi:10.1186/1471-2164-15-278), 2014-01-01
Supplement: 12864_2013_5994_MOESM10_ESM.pdf [file 12864_2013_5994_MOESM10_ESM.pdf]

**Table 1.** \*PCR and Taqman qPCR oligonucleotides used in this study.

|               | Oligonucleotide sequence (5' to 3') | Target          | Size   | Reference  |
|---------------|-------------------------------------|-----------------|--------|------------|
| <b>PCR</b>    |                                     |                 |        |            |
| AB1553        | CTCCAATCGGAGGGGTTGTG                | <i>omp6</i>     | 492bp  | [43]       |
| AB1554        | GCATAAATCCAGTTTAGCCTCC              |                 |        |            |
| AB1555        | GTGGTTAGATCTTTTCTGTTGGG             | <i>omp7</i>     | 399bp  | [43]       |
| AB1556        | CGCTCTACCACTGACCTTCATG              |                 |        |            |
| AB1591        | GCTGGAGTTCGAAGCGATGC                | <i>omp8</i>     | 259bp  | This study |
| AB1592        | CAGAGCGCCCTGTTTCAGTG                |                 |        |            |
| AB1559        | AGCTGGGGCTCTTGC GTTTG               | <i>omp9</i>     | 1096bp | [43]       |
| AB1560        | AACATATTCACTATAATCTGACGCTGC         |                 |        |            |
| AB1561        | TCCTTCGGGTTGCTGCGTTG                | <i>omp10</i>    | 969bp  | [43]       |
| AB1562        | GCTTACCCCATTCAGCAC                  |                 |        |            |
| AB1572        | AGGATGATCAGCCACACTGGAA              | <i>16S</i>      | 131bp  | This study |
| AB1573        | TACAACCCTAAGGCCTTCCTCA              |                 |        |            |
| <b>**qPCR</b> |                                     |                 |        |            |
| AB1591        | GCTGGAGTTCGAAGCGATGC                |                 |        |            |
| AB1592        | CAGAGCGCCCTGTTTCAGTG                | <i>omp8</i>     | 259bp  | This study |
| AB1593        | <u>GCGTGAGCACTGCGGTACAGACGG</u>     |                 |        |            |
| AB1581        | GAAGTCACTACACGACCTGACTGT            |                 |        |            |
| AB1582        | TAAAGCATCTTCGCGGGTTCGT              | <i>omp9</i>     | 145bp  | [43]       |
| AB1583        | <u>TATTCAGTGCGCTGAACACTGCGATCCA</u> |                 |        |            |
| AB1594        | GTGGGTGCTGTACGCACATT                |                 |        |            |
| AB1595        | AAAGACAGCAGGCAGCAACA                | <i>omp10-5'</i> | 170bp  | This study |
| AB1596        | <u>CGCGTGTCCTTCGGGTTGCT</u>         |                 |        |            |
| AB1569        | GGTGCTGAGTTGAAGCTTGC                |                 |        |            |
| AB1570        | GCCACAGACCCACTATCAGC                | <i>omp10-3'</i> | 140bp  | [43]       |
| AB1571        | <u>TATCTCGCGCTGCATCGGTG</u>         |                 |        |            |
| AB1572        | AGGATGATCAGCCACACTGGAA              |                 |        |            |
| AB1573        | TACAACCCTAAGGCCTTCCTCA              | <i>16S</i>      | 131bp  | [42]       |
| AB1574        | <u>TATTGGACAATGGGCGCAAGCCTGAT</u>   |                 |        |            |
| AB1606        | CTCACAGGCGAAGAAGCAGAC               |                 |        |            |
| AB1607        | GCCCGACATACCTGCCTTT                 | <i>msp5</i>     | 145bp  | [55]       |
| AB1610        | <u>TGGGCGACAAGAAGCCAAGTGA</u>       |                 |        |            |
| AB1608        | ATCAAAGCTATTGCGGAGGA                |                 |        |            |
| AB1607        | ACAGAACTCTCCCATGCAC                 | <i>rpoH</i>     | 116bp  | This study |
| AB1611        | <u>TGCCAATCGGGACGTTTCGC</u>         |                 |        |            |
| AB1242        | AAAACAGGCTTACCGCTCCAA               |                 |        |            |
| AB1243        | GCGTGTAGCTAGGCTCAAAGT               | <i>opag2</i>    | 151bp  | [41]       |
| AB1250        | <u>CTCTCCTCTGCTCAGGGCTCTGCG</u>     |                 |        |            |

\* Primers and TaqMan probes used were manufactured at Eurofins MGM Operon.

\*\* Underlined oligonucleotides are labeled with 6-Carboxyfluorescein 6-FAM at the 5' end and Tetramethylrhodamine TAMRA at the 3' end.
